# Supplementary material for: Clinical Approach in the Management of Paediatric Patients with Familial Hypercholesterolemia: A National Survey Conducted by the LIPIGEN Paediatric Group
Source: MDPI journal article supplement (doi:10.3390/nu15153468), 2023-08-05
Supplement: s1 [file s1]

## Article

# Clinical Approach in the Management of Paediatric Patients with Familial Hypercholesterolemia: A National Survey Conducted by the LIPIGEN Paediatric Group

Supplementary Table S1 - Questionnaire (English translation)

|   |                                                                                                                                                                                                                                                                                                                                                             |
|---|-------------------------------------------------------------------------------------------------------------------------------------------------------------------------------------------------------------------------------------------------------------------------------------------------------------------------------------------------------------|
| 1 | Has the child/adolescent received any indications before starting drug therapy? <ul style="list-style-type: none"> <li>No</li> <li>Yes, dietary-nutritional indications</li> <li>Yes, lifestyle change indications</li> <li>Yes, both dietary-nutritional and lifestyle change indications</li> </ul>                                                       |
| 2 | If yes, for how long is the child/adolescent's diet maintained before starting nutraceuticals or drug therapy? <ul style="list-style-type: none"> <li>4-8 weeks</li> <li>3-4 months</li> <li>6-8 months</li> <li>12 months</li> </ul>                                                                                                                       |
| 3 | What diet intervention is usually recommended for the child/adolescent? <ul style="list-style-type: none"> <li>Very low-fat diet (lipids <math>\leq</math> 25%)</li> <li>Moderate low-fat diet (lipids <math>\leq</math> 30%)</li> <li>Low-fat diet (lipids 25-30%) with portions</li> <li>Low-fat diet (lipids 25-30%) with qualitative advices</li> </ul> |
| 4 | The diet for the child/adolescent: <ul style="list-style-type: none"> <li>Is developed by the dietician</li> <li>Is developed by the nutritionist physician</li> <li>Consists of a pre-printed pattern</li> <li>Consists of qualitative advice derived from food recall or other survey method</li> </ul>                                                   |
| 5 | The compliance with the dietary intervention proposed to the child/adolescent is generally: <ul style="list-style-type: none"> <li>Poor</li> <li>Good</li> <li>Excellent</li> <li>Dependent on the frequency of counselling</li> </ul>                                                                                                                      |
| 6 | Was the child/adolescent recommended to take nutraceuticals or food supplements? <ul style="list-style-type: none"> <li>No</li> <li>Yes, before the pharmacological therapy</li> <li>Yes, as an alternative to pharmacological therapy</li> <li>Yes, in combination to start of the pharmacological therapy</li> </ul>                                      |
| 7 | Which nutraceutical-food supplement is mainly indicated as initial approach in child/adolescent?                                                                                                                                                                                                                                                            |
| 8 | What is the child/adolescent's compliance with the nutraceutical-food supplement on a scale from 1 to 10?                                                                                                                                                                                                                                                   |

|    |                                                                                                                                                                                                                                                                                                                                                                                                                                   |
|----|-----------------------------------------------------------------------------------------------------------------------------------------------------------------------------------------------------------------------------------------------------------------------------------------------------------------------------------------------------------------------------------------------------------------------------------|
| 9  | What is the concordance of the child/adolescent's parents with assumption of the nutraceutical-food supplement on a scale from 1 to 10?                                                                                                                                                                                                                                                                                           |
| 10 | What are the main adverse effects developed by the child/adolescent during the use of nutraceuticals-food supplements?                                                                                                                                                                                                                                                                                                            |
| 11 | How do you evaluate the usefulness of the dietary/nutritional approach in the management of FH in the child/adolescent, according to your experience? <ul style="list-style-type: none"> <li>• Not useful at all</li> <li>• Not very/sometimes useful</li> <li>• Very/often useful</li> <li>• Crucial</li> </ul>                                                                                                                  |
| 12 | How do you evaluate the usefulness of lifestyle modifications in the management of FH in the child/adolescent, according to your experience? <ul style="list-style-type: none"> <li>• Not useful at all</li> <li>• Not very/sometimes useful</li> <li>• Very/often useful</li> <li>• Crucial</li> </ul>                                                                                                                           |
| 13 | How do you evaluate the usefulness of nutraceutical interventions in the management of FH in the child/adolescent, according to your experience? <ul style="list-style-type: none"> <li>• Not useful at all</li> <li>• Not very/sometimes useful</li> <li>• Very/often useful</li> <li>• Crucial</li> </ul>                                                                                                                       |
| 14 | Do you consider the pharmacological therapy in child/adolescent? <ul style="list-style-type: none"> <li>• No</li> <li>• Yes, only in severe cases (LDL-C <math>\geq</math> 190 mg/dL or LDL-C <math>\geq</math> 160 mg/dL + risk factors)</li> <li>• Yes, only if the child/adolescent does not respond/respect the diet</li> <li>• Yes, only if the child/adolescent does not respond to the nutraceutical supplement</li> </ul> |
| 15 | In child/adolescent, the pharmacological therapy is usually started with <ul style="list-style-type: none"> <li>• Statin</li> <li>• Other drug</li> </ul>                                                                                                                                                                                                                                                                         |
| 16 | If statin, which statin(s) and at what dosage?                                                                                                                                                                                                                                                                                                                                                                                    |
| 17 | If other drug, which drug and at what dosage?                                                                                                                                                                                                                                                                                                                                                                                     |
| 18 | What is the child/adolescent's compliance with the pharmacological therapy on a scale from 1 to 10?                                                                                                                                                                                                                                                                                                                               |
| 19 | What is the concordance of the child/adolescent's parents with pharmacological therapy on a scale from 1 to 10?                                                                                                                                                                                                                                                                                                                   |
| 20 | What are the main adverse effects developed by the child/adolescent during the pharmacological therapy?                                                                                                                                                                                                                                                                                                                           |
